# Supplementary material for: Association between a Deficit Accumulation Frailty Index and Mobility Outcomes in Older Adults: Secondary Analysis of the Lifestyle Interventions and Independence for Elders (LIFE) Study
Source: MDPI journal article supplement (doi:10.3390/jcm9113757), 2020-11-22

# Table S1: LIFE Study variable names included in the frailty index

| Binary Measures (yes/no) assigned values of 0 or 1 based on presence |                                                                                 | Continuous or discrete numerical variables assigned weights (0, 0.25, 0.5, 0.75, 1) based on quintiles |                                                                                                                                                                                                                                                                                                                                                                                                                                                                                                                                                                                                                                                                                                                            |
|----------------------------------------------------------------------|---------------------------------------------------------------------------------|--------------------------------------------------------------------------------------------------------|----------------------------------------------------------------------------------------------------------------------------------------------------------------------------------------------------------------------------------------------------------------------------------------------------------------------------------------------------------------------------------------------------------------------------------------------------------------------------------------------------------------------------------------------------------------------------------------------------------------------------------------------------------------------------------------------------------------------------|
| Underweight (BMI $\leq 18.5$ )                                       | Fatigue                                                                         | Baseline SPPB                                                                                          | Total Rey-O                                                                                                                                                                                                                                                                                                                                                                                                                                                                                                                                                                                                                                                                                                                |
| Obese (BMI $\geq 30$ )                                               | Decreased appetite                                                              | CHAMPS score                                                                                           | MATSF Score                                                                                                                                                                                                                                                                                                                                                                                                                                                                                                                                                                                                                                                                                                                |
| Poor health (self-rated)                                             | Insomnia                                                                        | Basic Well-being                                                                                       | Minutes of moderate activity                                                                                                                                                                                                                                                                                                                                                                                                                                                                                                                                                                                                                                                                                               |
| Health worsened last 6 months (self-rated)                           | Dizziness                                                                       | Pepper Assessment Tool for Disability                                                                  | Steps per day                                                                                                                                                                                                                                                                                                                                                                                                                                                                                                                                                                                                                                                                                                              |
| High blood pressure                                                  | Stiff muscles                                                                   | Mobility Well-being                                                                                    |                                                                                                                                                                                                                                                                                                                                                                                                                                                                                                                                                                                                                                                                                                                            |
| Heart attack                                                         | Torn muscles                                                                    | I/ADLs                                                                                                 |                                                                                                                                                                                                                                                                                                                                                                                                                                                                                                                                                                                                                                                                                                                            |
| Heart failure                                                        | Foot pain                                                                       | Baseline gait speed                                                                                    |                                                                                                                                                                                                                                                                                                                                                                                                                                                                                                                                                                                                                                                                                                                            |
| Pacemaker                                                            | Hospitalized in last 6 months                                                   | Self-efficacy for walking 400m                                                                         |                                                                                                                                                                                                                                                                                                                                                                                                                                                                                                                                                                                                                                                                                                                            |
| Stroke                                                               | Peripheral artery disease                                                       | CPX                                                                                                    |                                                                                                                                                                                                                                                                                                                                                                                                                                                                                                                                                                                                                                                                                                                            |
| Cancer                                                               | Asthma                                                                          | MOB                                                                                                    |                                                                                                                                                                                                                                                                                                                                                                                                                                                                                                                                                                                                                                                                                                                            |
| Diabetes                                                             | Pneumonia                                                                       | PAC                                                                                                    | <b>Abbreviations:</b><br>SPPB=short physical performance battery;<br>CHAMPS=Community Health Activities Model Program for Seniors;<br>I/ADLs=instrumental/activities of daily living ;<br>CPX=Symptoms score from the QWB survey;<br>MOB=Mobility score from the QWB survey;<br>PAC= Physical activity score from the QWB survey;<br>SAC=Social & self-care activity score;<br>QWB=Quality and Wellbeing Survey total score ;<br>CESD=Center for Epidemiologic Studies Depression scale;<br>HRQL=health-related quality of life ; 3MSE=Modified Mini-Mental State Examination; FAQ=Functional Activities Questionnaire ;<br>Rey-O=Rey-Osterrieth Complex Figure assessment;<br>MATSF= Mobility Assessment Tool-short form; |
| Broken hip                                                           | Bronchitis                                                                      | SAC                                                                                                    |                                                                                                                                                                                                                                                                                                                                                                                                                                                                                                                                                                                                                                                                                                                            |
| Broken bone                                                          | Low vision                                                                      | TotalQWB                                                                                               |                                                                                                                                                                                                                                                                                                                                                                                                                                                                                                                                                                                                                                                                                                                            |
| Arthritis                                                            | CABG history                                                                    | Number of medications                                                                                  |                                                                                                                                                                                                                                                                                                                                                                                                                                                                                                                                                                                                                                                                                                                            |
| Liver disease                                                        | <b>Abbreviations:</b> BMI=body mass index; CABG=coronary artery bypass grafting | Grip strength                                                                                          |                                                                                                                                                                                                                                                                                                                                                                                                                                                                                                                                                                                                                                                                                                                            |
| Psychiatric conditions                                               |                                                                                 | CESD Score                                                                                             |                                                                                                                                                                                                                                                                                                                                                                                                                                                                                                                                                                                                                                                                                                                            |
| Other conditions                                                     |                                                                                 | HRQL Stress                                                                                            |                                                                                                                                                                                                                                                                                                                                                                                                                                                                                                                                                                                                                                                                                                                            |
| Back injury                                                          |                                                                                 | 3MSE                                                                                                   |                                                                                                                                                                                                                                                                                                                                                                                                                                                                                                                                                                                                                                                                                                                            |
| Paralysis                                                            |                                                                                 | Cognitive battery test scores (9)                                                                      |                                                                                                                                                                                                                                                                                                                                                                                                                                                                                                                                                                                                                                                                                                                            |
| Fainting                                                             |                                                                                 | Epworth Sleep                                                                                          |                                                                                                                                                                                                                                                                                                                                                                                                                                                                                                                                                                                                                                                                                                                            |
| Abnormal heart rhythm                                                |                                                                                 | Insomnia score                                                                                         |                                                                                                                                                                                                                                                                                                                                                                                                                                                                                                                                                                                                                                                                                                                            |
| Foot ulcer                                                           |                                                                                 | Pitt Sleep Score                                                                                       |                                                                                                                                                                                                                                                                                                                                                                                                                                                                                                                                                                                                                                                                                                                            |
| Wounds                                                               |                                                                                 | Berlin score                                                                                           |                                                                                                                                                                                                                                                                                                                                                                                                                                                                                                                                                                                                                                                                                                                            |
| Anxiety                                                              |                                                                                 | Sum FAQ Score                                                                                          |                                                                                                                                                                                                                                                                                                                                                                                                                                                                                                                                                                                                                                                                                                                            |

Figure S1: Output from the %FINDCUT macro program applying Cogan and O'Quigley's method to identify a cut-point in the frailty index based on data driven measures

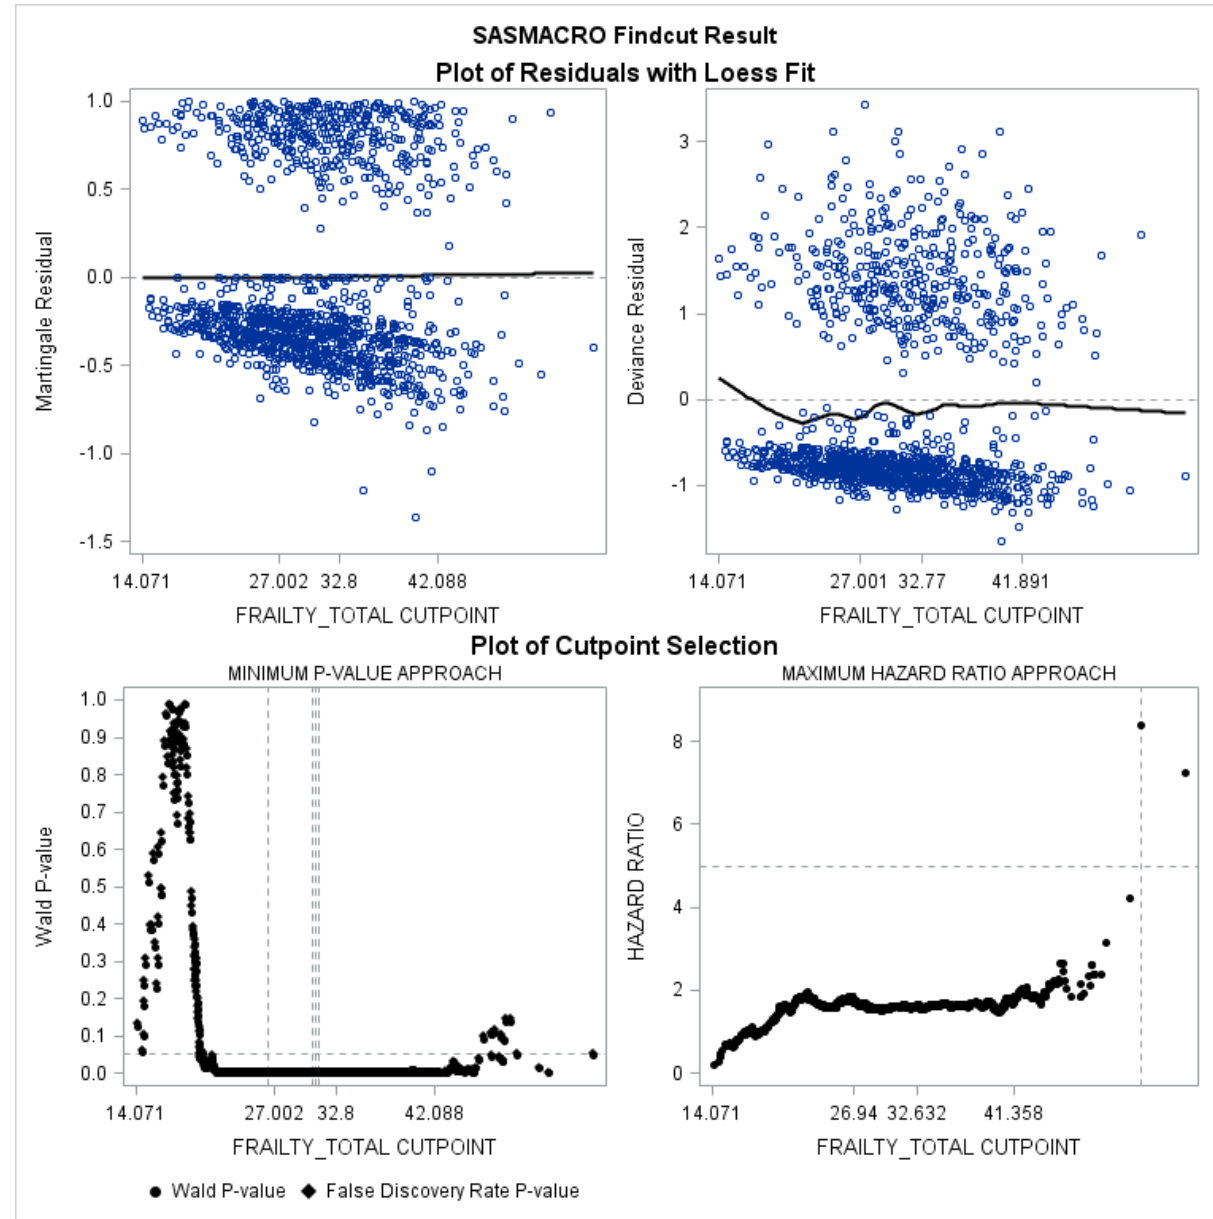

Figure S2: Kaplan-Meier plots of survival probabilities for MMD stratified by cut-point iterations at the 50<sup>th</sup>, 75<sup>th</sup>, 85<sup>th</sup>, 90<sup>th</sup>, and 95<sup>th</sup> percentiles and by intervention or control group assignment.

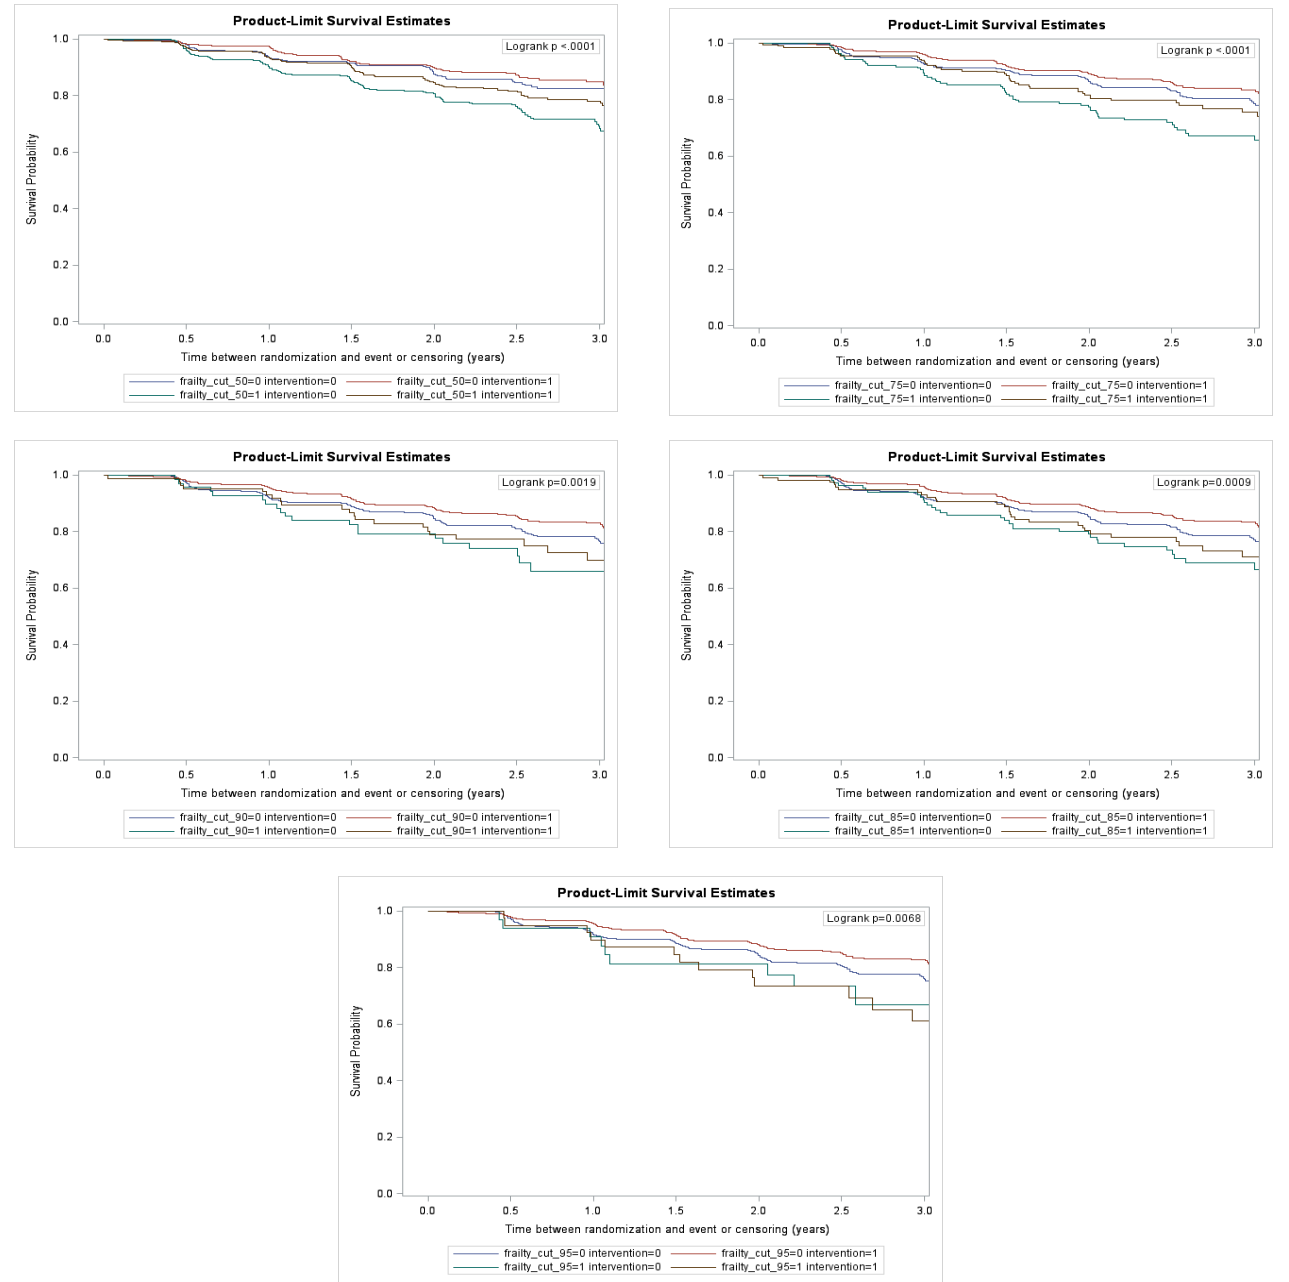

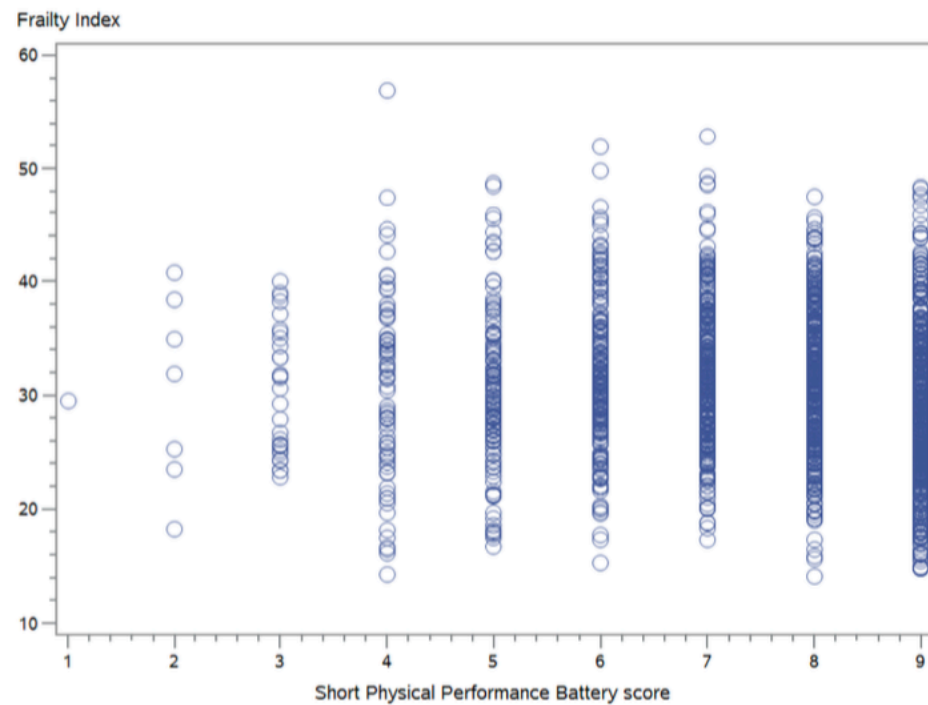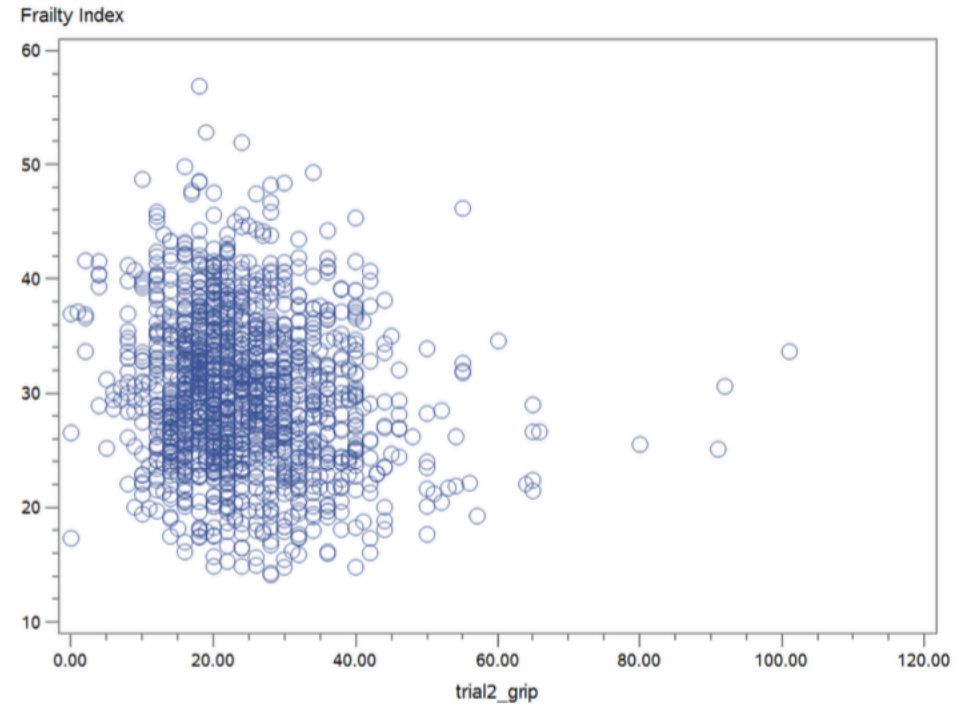

Figure S3: Correlation plots of the frailty index (y-axis) with various physical functioning measures (x-axis) including Short Physical Performance Batter score, grip strength, and gait speed.

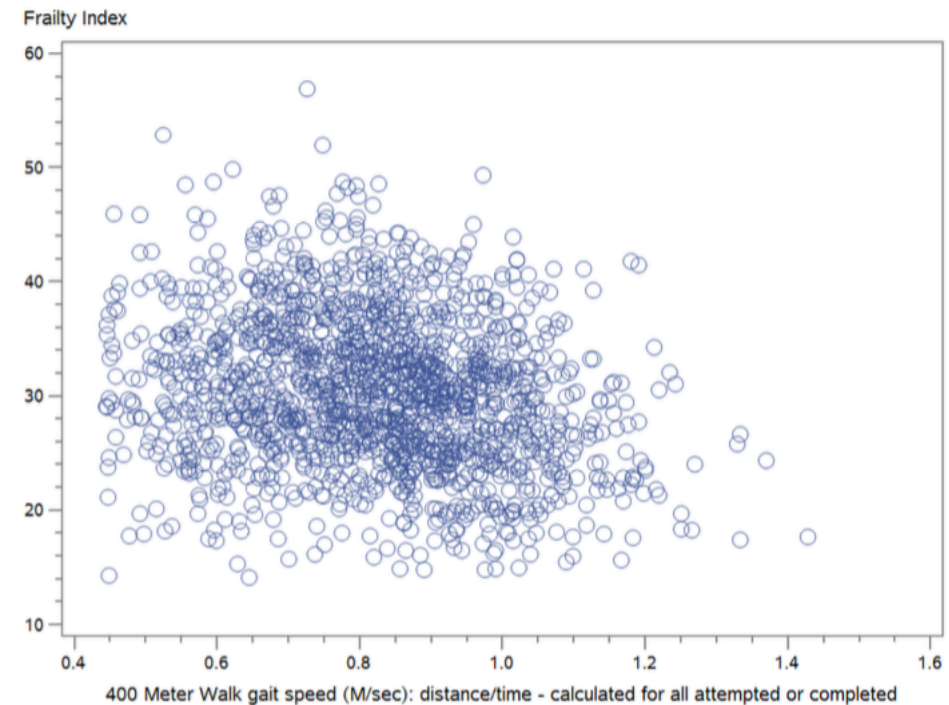

Supplement: s1 [file s1]
